# Supplementary material
Source: Springer Nature journal article supplement (https://www.springermedizin.de/resource/supplementary/13020_2008_46_MOESM2_ESM.pdf/9640862)

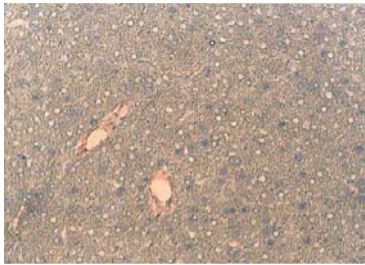

Normal

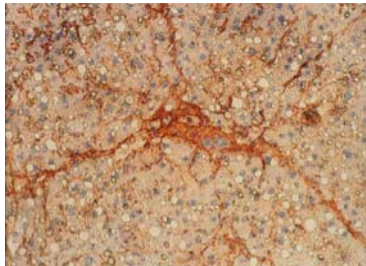

Model

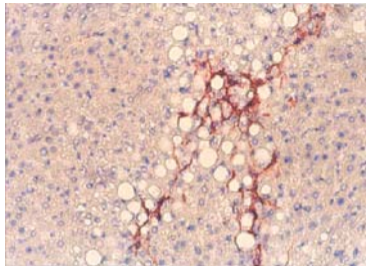

FZHY

Supplement: MOESM2 [file 9640862]
